# Supplementary material for: Genome-wide association mapping of leaf mass traits in a Vietnamese rice landrace panel
Source: PLoS One. 2019 Jul 8;14(7):e0219274. doi: 10.1371/journal.pone.0219274 (PMC6613685; doi:10.1371/journal.pone.0219274)
Supplement: S1 Table — Table A. List of the 183 rice accessions used in the experiment. TRAD: traditional; IMP: improved; na: no data available; IR: irrigated; MG: mangrove; RL: rainfed lowland; UP: upland; I: indica; J: japonica; Sub-pop: sub-populations, as defined in [37]. Table B. GWAS associations and significant markers at P < 5e-04 in the full panel, the indica and the japonica subpopulations. Chr: chromosome; FW: leaf fresh weight; TW: leaf turgid weight; DW: leaf dry weight; RTW: relative tissue weight; LDMP: leaf dry matter percentage. Table C. Comparison of the QTLs identified in this study with those previously detected in mapping populations listed in TropGeneDB. FW: leaf fresh weight; TW: leaf turgid weight; DW: leaf dry weight; RTW: relative tissue weight; LDMP: leaf dry matter percentage. Table D. Colocalizations of the GWAS associations identified in current and previous studies using the same rice panel and genotypic data. (XLSX) [file pone.0219274.s001.xlsx]

## Sheet: Table A
Table A. List of the 183 rice accessions used in the experiment
Accession	Genebank ID	Name	Province	Type	Ecosyst.	Group	Sub pop
G1	VNPRC_11	TEP HAI PHONG	Hai Phong	TRAD	na	I	Im
G10	VNPRC_216	TAM SON NAM DINH	Nam Dinh	TRAD	na	I	I4
G100	VNPRC_6969	KHAU QUAI DANG 2	TuyenQuang	TRAD	UP	I	J1
G101	VNPRC_7295	DIEO KBIN	Tay Nguyen	TRAD	na	J	J1
G102	VNPRC_7303	TZO KOH DANG 2	ThuaThien Hue	TRAD	na	I	Im
G103	VNPRC_7304	CU PUA DANG 1	ThuaThien Hue	TRAD	na	J	Jm
G104	VNPRC_7305	CU PUA DANG 2	ThuaThien Hue	TRAD	na	I	Im
G105	VNPRC_7312	NEP THAI LAN	Ha Giang	TRAD	na	I	I3
G106	VNPRC_7316	NEP HAI HAU	NinhBinh	TRAD	IR	J	J2
G107	VNPRC_7317	NEP THAI BINH LUN	NinhBinh	TRAD	IR	J	J2
G108	VNPRC_7318	TAM AP BE	NinhBinh	TRAD	IR	m	m
G109	VNPRC_7349	MANH GIE	QuangBinh	TRAD	UP	I	Im
G11	VNPRC_219	TAM TRON HAI DUONG	Hai Duong	TRAD	na	I	I4
G110	VNPRC_7823	RAN TRANG	BinhThuan	TRAD	UP	I	Im
G111	VNPRC_7824	NEP RAY	BinhThuan	TRAD	UP	I	Im
G113	VNPRC_7827	NANG THIET	Vung Tau	TRAD	IR	I	I2
G115	VNPRC_7910	KOI LOI	na	TRAD	na	I	Im
G117	VNPRC_7930	KHAO SANG	Quang Tri	TRAD	UP	J	Jm
G119	VNPRC_9198	L26	na	IMP	na	I	Im
G12	VNPRC_226	TAM CAO VINH PHUC	VinhPhuc	TRAD	na	I	I4
G120	VNPRC_9219	BAY THANH	Ca Mau	TRAD	na	I	I2
G121	VNPRC_9246	CA RO	TayNinh	TRAD	IR	I	Im
G124	VNPRC_9355	NEP DEN	QuangNinh	TRAD	IR	J	J2
G125	VNPRC_9356	NEP NUONG	QuangNinh	TRAD	na	I	Im
G126	VNPRC_9466	KHAU DAM DOI	Nghe An	TRAD	UP	J	J1
G128	VNPRC_9476	KHAU DAM	Nghe An	TRAD	UP	J	J1
G129	VNPRC_9507	LC93-2	KhanhHoa	TRAD	UP	I	Im
G130	VNPRC_9509	LUA DA BO	KhanhHoa	TRAD	UP	J	J3
G131	VNPRC_9517	PADAI LONG KHANH	KhanhHoa	TRAD	UP	J	J3
G132	VNPRC_9520	PADAI TLIG JUG	KhanhHoa	TRAD	UP	I	Im
G133	VNPRC_9524	A 330	KhanhHoa	IMP	IR	I	I1
G134	VNPRC_9530	PADAI CALOC	KhanhHoa	TRAD	UP	J	Jm
G136	VNPRC_9541	PHUOC LONG	KhanhHoa	TRAD	UP	I	Im
G138	VNPRC_9563	NANG QUAT	Ben Tre	TRAD	RL	I	Im
G139	VNPRC_9568	LUA NANG DEN	Ben Tre	TRAD	RL	I	I2
G14	VNPRC_318	TAM NHO BAC NINH	Bac Ninh	TRAD	na	I	I4
G140	VNPRC_9570	LUA BAY DANH	Ben Tre	TRAD	RL	I	I2
G141	VNPRC_9573	LUA NANG NIEU CHUM	Ben Tre	TRAD	RL	I	I2
G143	VNPRC_9576	NEP TROI CHO	Ben Tre	TRAD	RL	I	I2
G144	VNPRC_9578	LUA MUA DIA PHUONG	Ben Tre	TRAD	RL	I	I2
G145	VNPRC_9580	BA RIA	Ben Tre	TRAD	RL	J	J1
G146	VNPRC_9584	NANG LOAN HAT TRON	Ben Tre	TRAD	RL	I	I2
G147	VNPRC_9585	LUA NANG LOAN HAT DAI	Ben Tre	TRAD	IR	I	I2
G150	VNPRC_9595	NEP DIA PHUONG	Ben Tre	TRAD	IR	I	I2
G152	VNPRC_9871	LOC SOM	Bac Giang	TRAD	na	J	J1
G153	VNPRC_9874	TE NUONG	ThanhHoa	TRAD	UP	I	I3
G154	VNPRC_9878	NEP THOM	Ha Tay	TRAD	IR	J	J2
G155	VNPRC_9908	KHAU PE LANH	Son La	TRAD	UP	I	I3
G156	VNPRC_9967	LUA K	na	TRAD	na	I	Im
G157	VNPRC_9984	SO CRIOONG	Sekong	TRAD	na	J	Jm
G158	VNPRC_12049	VA TAI ANA ACU	NinhThuan	TRAD	UP	J	J3
G16	VNPRC_384	NEP VAN RUONG HOA BINH	HoaBinh	TRAD	na	J	J2
G160	VNPRC_12059	JASMINE	An Giang	IMP	UP	I	Im
G161	VNPRC_12066	BN1	An Giang	IMP	IR	I	Im
G162	VNPRC_12068	NEANG CON	An Giang	TRAD	UP	I	I2
G163	VNPRC_12071	CA CHOCH CHAP	An Giang	TRAD	UP	I	Im
G165	VNPRC_12083	GIONG 90 NGAY	KienGiang	TRAD	RL	I	I1
G166	VNPRC_12086	CHIN TEO	KienGiang	TRAD	na	I	I2
G167	VNPRC_12088	THAN NONG MUA	KienGiang	TRAD	RL	I	I2
G168	VNPRC_12101	OM1490	KienGiang	IMP	IR	I	I1
G169	VNPRC_12102	JASMINE 95	KienGiang	IMP	IR	I	I1
G17	VNPRC_394	NEP GA GAY HAI DUONG	Hai Duong	TRAD	na	I	Im
G170	VNPRC_12103	OM 504 JAPAN	KienGiang	IMP	IR	I	I1
G171	VNPRC_12104	NEP THAI	KienGiang	TRAD	IR	I	I1
G172	VNPRC_12105	VND 95-20	KienGiang	IMP	IR	I	I1
G173	VNPRC_12107	TAM THOM TRUNG QUOC	KienGiang	TRAD	IR	I	Im
G177	VNPRC_12563	CHAM HOM	HoaBinh	TRAD	na	J	J1
G178	VNPRC_12573	KHAU CHINH PHU	HoaBinh	TRAD	na	J	J1
G179	VNPRC_12581	BLAO PU LAU	HoaBinh	TRAD	na	J	J1
G18	VNPRC_407	NEP QUYT HAI DUONG	Hai Duong	TRAD	na	I	I4
G180	VNPRC_12637	CA DUNG HAT	na	TRAD	na	I	I2
G181	VNPRC_12970	BLAU PLAN PIENG	Son La	TRAD	UP	I	I6
G182	VNPRC_13008	KHAU MO	Son La	TRAD	UP	I	I6
G183	VNPRC_13076	KHAU PE LANH	Son La	TRAD	UP	I	Im
G186	VNPRC_13309	KHAU NO	Son La	TRAD	UP	I	Im
G187	VNPRC_13320	KHAU DUONG PHUONG	Son La	TRAD	UP	J	J1
G189	VNPRC_13362	KHAU NAM RINH	Dien Bien	TRAD	UP	I	I3
G19	VNPRC_509	ON	na	TRAD	na	I	Im
G190	VNPRC_13363	PLE PHMA CHUA	Dien Bien	TRAD	UP	I	Im
G191	VNPRC_13422	KHAU TAN	Dien Bien	TRAD	RL	J	J2
G192	VNPRC_13423	KHAU BAO THAI	Dien Bien	TRAD	RL	I	Im
G193	VNPRC_13424	BLE PE XA	Dien Bien	TRAD	UP	J	J1
G194	VNPRC_13425	BLE BLAU LIA	Dien Bien	TRAD	UP	J	J1
G195	VNPRC_13426	BLE BDE	Dien Bien	TRAD	UP	J	J1
G196	VNPRC_13427	BLE CO PON	Dien Bien	TRAD	UP	m	m
G2	VNPRC_58	TA CO LAO CAI	Lao Cai	TRAD	na	I	Im
G20	VNPRC_553	TE LE HOA BINH	HoaBinh	TRAD	na	I	I4
G200	VNPRC_13431	CHA FU NU	Lai Chau	TRAD	UP	J	J1
G201	VNPRC_13435	CHA XU PHU LU	Lai Chau	TRAD	UP	I	Im
G202	VNPRC_13442	NONG TO	Lai Chau	TRAD	UP	J	J1
G203	VNPRC_14212	PLAU CA BANH	Dien Bien	TRAD	UP	J	J1
G204	VNPRC_14215	PLE DO	Dien Bien	TRAD	UP	J	J1
G206	VNPRC_14252	BLE BLAU DO	Son La	TRAD	UP	J	J1
G207	VNPRC_14278	KHAU LUA	Son La	TRAD	RL	m	m
G208	VNPRC_14279	KHAU BOONG LAM	Son La	TRAD	RL	I	Im
G209	VNPRC_14386	BLE CHO	Lai Chau	TRAD	UP	I	I6
G21	VNPRC_614	GIE TRANG HOA BINH	HoaBinh	TRAD	na	I	I4
G210	VNPRC_14408	KHAU LECH	Lao Cai	TRAD	UP	J	J1
G211	VNPRC_14587	PLAU NGOANG PLAC	Lao Cai	TRAD	UP	I	Im
G212	VNPRC_14589	PLAU BULAT	Lao Cai	TRAD	UP	J	J1
G214	VNPRC_14596	BLE BLAU DO	Lao Cai	TRAD	RL	J	Jm
G216	VNPRC_14607	TOM BEO BUA	Lao Cai	TRAD	RL	J	J1
G217	VNPRC_14615	BLE BLAU SOA	Lao Cai	TRAD	RL	J	J1
G219	VNPRC_14792	KHAU LA LANH	Son La	TRAD	RL	I	Im
G22	VNPRC_760	TRUNG TRANG TUYEN QUANG	na	TRAD	na	I	I4
G220	VNPRC_T5300	PLE LA	na	TRAD	UP	J	J1
G221	VNPRC_T5455	KHAU MAC CO	na	TRAD	UP	J	J1
G222	VNPRC_T6404	PLE MA MU	na	TRAD	UP	J	J1
G223	VNPRC_T6794	BLE BLAU TAN	na	TRAD	UP	J	J1
G24	VNPRC_1048	TAM XOAN HAI HAU	Nam Dinh	TRAD	na	m	m
G25	VNPRC_1058	NEP VANG ONG LAC SON HB	HoaBinh	TRAD	na	J	J2
G26	VNPRC_1325	KHAU CAI NOI	Tay Bac	TRAD	na	J	J1
G299	VNPRC_4806	BLAO SINH SAI	HoaBinh	TRAD	na	J	J1
G3	VNPRC_85	AN TU VO DO	na	TRAD	na	I	I4
G30	VNPRC_1625	TIEU CHET 5	Can Tho	TRAD	na	I	I2
G300	VNPRC_5863	NANG QUOT BIEN	Bac Lieu	TRAD	na	I	I2
G31	VNPRC_1629	NANG CHI	Can Tho	TRAD	na	I	I2
G32	VNPRC_1633	NANG DUM	Can Tho	TRAD	na	I	Im
G35	VNPRC_1638	SANAKI	Can Tho	na	na	I	I2
G36	VNPRC_1643	NANG TAY	Can Tho	TRAD	na	I	Im
G37	VNPRC_1845	NEP CAM	Ha Giang	TRAD	RL	I	Im
G38	VNPRC_1849	NEP NUONG	Ha Giang	TRAD	UP	J	J1
G39	VNPRC_1851	NEP CAM	Ha Giang	TRAD	RL	I	Im
G4	VNPRC_135	NHONG DO HAI DUONG	Hai Duong	TRAD	na	I	I4
G40	VNPRC_2307	NEP DO	KienGiang	TRAD	RL	I	I2
G41	VNPRC_2310	LUA DO	KienGiang	TRAD	RL	I	I2
G42	VNPRC_2313	LUA HON COI	KienGiang	TRAD	RL	I	I2
G43	VNPRC_2315	THANH TUA	KienGiang	TRAD	RL	I	I2
G45	VNPRC_2367	NEP CUC	NinhBinh	TRAD	RL	J	J4
G46	VNPRC_2368	NEP BA LAO	Nam Dinh	TRAD	MG	J	J4
G47	VNPRC_2369	NEP ONG LAO	Nam Dinh	TRAD	MG	J	J4
G48	VNPRC_2371	LUA NGOI	Nam Dinh	TRAD	MG	J	J4
G49	VNPRC_2395	DT10	na	IMP	na	I	I1
G5	VNPRC_149	NHONG TRANG HAI PHONG	Hai Phong	TRAD	na	I	I4
G50	VNPRC_3323	LUA NEP BA THANG DANG 1	Quang Nam	TRAD	UP	J	J2
G51	VNPRC_3332	BA TRANG HUONG	Quang Nam	TRAD	UP	I	I5
G52	VNPRC_3334	BA TRANG HUONG	Quang Nam	TRAD	UP	I	I5
G53	VNPRC_3351	LUA CAN DO	na	TRAD	na	I	I6
G54	VNPRC_3360	LUA LOC DO	Quang Nam	TRAD	RL	I	I6
G56	VNPRC_3363	LUA MAN	Quang Nam	TRAD	RL	I	I5
G57	VNPRC_3364	NEP GHIM HUONG	Quang Nam	TRAD	RL	I	Im
G58	VNPRC_3368	NEP HUONG LANG	Quang Nam	TRAD	MG	I	I6
G59	VNPRC_3371	NEP MAM	Quang Nam	TRAD	na	I	I6
G6	VNPRC_170	SOM GIAI HUNG YEN	na	TRAD	na	I	I4
G61	VNPRC_3402	NEP RAN	QuangBinh	TRAD	na	J	J2
G62	VNPRC_3426	QUANG TRANG	Quang Tri	TRAD	IR	I	I5
G63	VNPRC_3429	CHIEM DO	Quang Tri	TRAD	na	I	I4
G64	VNPRC_3433	VEN DO	Quang Tri	TRAD	IR	I	I5
G65	VNPRC_3443	NUOC MAN DANG 1	Quang Tri	TRAD	RL	I	I5
G67	VNPRC_3485	LUA TRI DO DANG 2	BinhDinh	TRAD	RL	I	Im
G68	VNPRC_3487	NEP 3 THANG	BinhDinh	TRAD	IR	m	m
G69	VNPRC_3488	COC MOI DANG 1	BinhDinh	TRAD	RL	I	I6
G7	VNPRC_172	TE TRANG HOA BINH	HoaBinh	TRAD	na	I	I4
G70	VNPRC_3489	COC MOI DANG 2	BinhDinh	TRAD	RL	I	Im
G72	VNPRC_3494	LUA CANG DANG 1	BinhDinh	TRAD	RL	I	Im
G73	VNPRC_3495	LUA CANG DANG 1	BinhDinh	TRAD	RL	I	I6
G74	VNPRC_3497	NEP QUA CO RAU DANG 2	BinhDinh	TRAD	RL	I	I6
G77	VNPRC_3506	CANG KIEN DANG 1	BinhDinh	TRAD	RL	I	I6
G78	VNPRC_3507	CANG KIEN DANG 2	BinhDinh	TRAD	RL	I	I6
G79	VNPRC_3508	LUA DA DANG 2	BinhDinh	TRAD	RL	I	I6
G8	VNPRC_175	CHON TU 502 HOC VIEN	na	TRAD	na	I	I4
G80	VNPRC_3517	BA KTONG	Quang Ngai	TRAD	UP	J	J3
G81	VNPRC_3519	BA DO DANG 1	Quang Ngai	TRAD	UP	m	m
G83	VNPRC_3522	NEP VANG	Quang Ngai	TRAD	UP	J	Jm
G84	VNPRC_3525	BA CHO KTE	BinhDinh	TRAD	na	J	J3
G85	VNPRC_3550	CHANH CHUI	ThanhHoa	TRAD	MG	J	J4
G86	VNPRC_3588	TAN NGAN	Yen Bai	TRAD	na	J	J2
G87	VNPRC_3886	KHAU PAN PUA	na	TRAD	na	J	J1
G88	VNPRC_3895	BLE MA MUA	na	TRAD	na	J	J1
G89	VNPRC_3947	KHAU BO KHA	na	TRAD	na	J	J1
G9	VNPRC_200	LOC TRANG SOM PLAY CAU	na	TRAD	na	I	I4
G90	VNPRC_4812	BLAO CLIA	HoaBinh	TRAD	UP	J	J1
G91	VNPRC_4815	BLAO CO KEN	HoaBinh	TRAD	UP	J	J1
G92	VNPRC_4820	BLAO CO CAM	HoaBinh	TRAD	UP	J	J1
G93	VNPRC_5034	PO LE PO LAU XA	Nghe An	TRAD	UP	I	I5
G94	VNPRC_5111	LUA DO	ThuaThien Hue	TRAD	UP	I	I5
G95	VNPRC_5127	LUA CHAM	Nam Dinh	TRAD	RL	I	I4
G96	VNPRC_6191	CHIEM RONG	Nam Dinh	TRAD	IR	I	Im
G98	VNPRC_6203	NGOI TIA	Nam Dinh	TRAD	RL	J	J4
G99	VNPRC_6234	LUA CHAM BIEN	NinhBinh	TRAD	RL	I	I4
IR64	IRGC_66970	IR64	na	IMP	IR	I	I
NPB	IRGC_12731	NIPPONBARE	na	IMP	IR	J	J
AZ	IRGC_328	AZUCENA	na	IMP	UP	J	J
TRAD: traditional; IMP: improved; na: no data available; IR: irrigated; MG: mangrove; RL: rainfed lowland; UP: upland; I: indica; J: japonica; Sub-pop: sub-populations, as defined in [37]

## Sheet: Table B
Table B. GWAS associations and significant markers at P < 5e-04 in the full panel, the indica and the japonica subpopulations
No	SNP markers	Chr	Position	Trait	P-values			Marker R2 (%)
					Full	Indica	Japonica
1	Dj01_34575326F	1	34575326	LDMP	9.3054e-05	0.00013455		8.32-14.70
2	Dj01_34588489F	1	34588489	LDMP	0.00018176	0.00046985		7.60-12.19
3	Sj01_37992492R	1	37992492	FW		6.0405e-05		15.334
				TW		0.00017873		13.158
4	Dj01_41100340F	1	41100340	FW		6.7891e-05		15.107
			41100340	TW		2.6009e-05		16.877
5	Dj02_05973124R	2	5973124	FW	7.6484e-05			8.554
				TW	9.5751e-05			8.293
6	Sj02_06017336R	2	6017336	FW	0.00039171			6.813
				TW	0.00042021			6.724
7	Sj02_06055156F	2	6055156	FW	0.00023333			7.36
				TW	7.364e-05			8.575
8	Sj02_06162441R	2	6162441	FW	7.6484e-05			8.554
				TW	9.5751e-05			8.293
9	Dj02_06196654R	2	6196654	FW	7.6484e-05			8.554
				TW	9.5751e-05			8.293
10	Dj02_06219733F	2	6219733	FW	7.6484e-05			8.554
				TW	9.5751e-05			8.293
11	Dj02_24125340R	2	24125340	FW		9.0204e-05		14.557
				TW		0.0001696		13.257
12	Sj02_24125366F	2	24125366	FW		9.0204e-05		14.557
				TW		0.0001696		13.257
13	Sj02_24128723R	2	24128723	FW		2.463e-05		17.101
				TW		7.7316e-05		14.753
14	Dj03_34620912F	3	34620912	FW		0.00010884		14.195
				TW		7.1899e-05		14.893
15	Dj03_34623729F	3	34623729	FW		7.6239e-05		14.882
				TW		4.9388e-05		15.62
16	Dj04_16884687R	4	16884687	FW	8.7491e-05			8.409
				TW	8.53e-05			8.417
17	Dj04_16900879F	4	16900879	FW	0.00029397			7.115
				TW	0.00029539			7.094
18	Dj04_16929976R	4	16929976	FW	8.7491e-05			8.409
				TW	8.53e-05			8.417
19	Dj04_16934719R	4	16934719	FW	0.00029397			7.115
				TW	0.00029539			7.094
20	Dj04_16935140R	4	16935140	FW	0.00029397			7.115
				TW	0.00029539			7.094
21	Dj05_01445318F	5	1445318	RTW	9.3469e-05			9.031
22	Sj06_03437953R	6	3437953	RTW		0.00035572		12.817
23	Dj06_03490044F	6	3490044	RTW	0.00022164	8.6318e-05		8.03-15.70
24	Dj06_03786406F	6	3786406	RTW		0.00046512		12.283
25	Dj06_17773531R	6	17773531	FW	8.9143e-05			8.389
				TW	7.0262e-05			8.626
26	Sj06_17792351R	6	17792351	FW	0.00018861			7.586
				TW	0.00021074			7.451
27	Dj06_17792359F	6	17792359	TW		0.00019135		13.029
28	Dj10_17237882R	10	17237882	FW	9.8594e-07			13.421
				TW	7.3725e-07			13.726
				DW	5.0168e-05			8.936
29	Sj10_17237925F	10	17237925	FW	0.00021631			7.44
				TW	0.00020014			7.505
30	Sj10_17247016R	10	17247016	FW	3.8415e-06			11.866
				TW	1.9727e-06			12.595
				DW	0.00019261			7.5
31	Dj10_17356177R	10	17356177	FW	0.00030251			7.085
				TW	0.0001887			7.568
32	Sj10_17454774F	10	17454774	FW	0.0001097			8.165
				TW	0.00030846			7.048
33	Sj10_17498080F	10	17498080	FW	1.368e-06			13.044
				TW	1.8252e-06			12.684
				DW	4.3053e-05			9.101
34	Dj10_17529425F	10	17529425	FW	2.6371e-06			12.293
				TW	2.0199e-06			12.568
				DW	7.5787e-05			8.492
35	Sj10_17623686F	10	17623686	FW	0.00027646			7.18
				TW	0.00026472			7.21
36	Sj10_17639088R	10	17639088	FW	0.00027646			7.18
				TW	0.00026472			7.21
37	Sj10_17733323R	10	17733323	FW	0.00027646			7.18
				TW	0.00026472			7.21
38	Sj10_17859826F	10	17859826	FW	0.00027646			7.18
				TW	0.00026472			7.21
39	Sj10_17862276R	10	17862276	FW	0.00027646			7.18
				TW	0.00026472			7.21
40	Sj10_17948827R	10	17948827	FW	0.00027646			7.18
				TW	0.00026472			7.21
41	Dj10_18043480R	10	18043480	FW	4.7921e-05			9.062
				TW	5.6195e-05			8.868
				DW	0.00023291			7.3
42	Dj10_18044898F	10	18044898	FW	5.5423e-05			8.903
				TW	7.5269e-05			8.552
				DW	0.00022084			7.356
43	Dj10_18059128R	10	18059128	FW	5.5423e-05			8.903
				TW	7.5269e-05			8.552
				DW	0.00022084			7.356
44	Sj10_18059798F	10	18059798	FW	1.8243e-05			10.122
				TW	2.1273e-05			9.929
				DW	5.2385e-05			8.889
45	Dj12_6897395F	12	6897395	FW	0.00016351			7.738
				TW	0.00032897			6.981
46	Sj12_07021617F	12	7021617	FW	1.7788e-05			10.15
				TW	4.7539e-05			9.049
47	Dj12_7098698F	12	7098698	FW	0.00041134			6.762
48	Sj12_07141821R	12	7141821	FW	4.8968e-05			9.038
				TW	8.0088e-05			8.485
49	Dj12_7160332R	12	7160332	FW	7.7749e-05			8.536
				TW	0.00015128			7.803
50	Sj12_26772855R	12	26772855	FW	3.6009e-05			9.374
				TW	3.3974e-05			9.416
Chr: chromosome; FW: leaf fresh weight; TW: leaf turgid weight; DW: leaf dry weight; RTW: relative tissue weight; LDMC: leaf dry matter content

## Sheet: Table C
Table C. Comparison of the QTLs identified in this study with those previously detected in mapping populations from TropGeneDB
QTLs of this study		QTLs of previous studies
QTLs	Trait(s)	QTL_TropgeneDB	Trait name	Symbol	Chromosome	Confidence interval		QTL study	DOI	Year	Place	Location	Aerobicity	Ecosystem	Stress	Population_name	Cross_type	Population _type	Reference
QTL_1	LDMP	q0491	Cell membrane stability	CMS	1	31367453	37887562	Tripathy et al (2000)	10.1007/s001220051424	1998	Lubbock, Texas, USA	Greenhouse	Aerobic		Water stress	CT9993-5-10-1-M/IR62266-42-6-2	japonica/indica	DH	Rice9
QTL_1	LDMP	q0766	Tiller number	TN	1	32310761	34940769	Lafitte & Courtois (1999)	ISBN 970-648-052-8	1995	Los Banos, Philippines	Field	Aerobic	Upland	No stress	IR64/Azucena	indica/japonica	DH	Rice7
QTL_1	LDMP	q0774	Tiller number	TN	1	32310761	34940769	Lafitte & Courtois (1999)	ISBN 970-648-052-8	1995	Los Banos, Philippines	Field	Aerobic	Upland	Water stress	IR64/Azucena	indica/japonica	DH	Rice7
QTL_1	LDMP	q0781	Tiller number	TN	1	32310761	34940769	Lafitte & Courtois (1999)	ISBN 970-648-052-8	1998	Los Banos, Philippines	Field	Aerobic	Upland	Water stress	IR64/Azucena	indica/japonica	DH	Rice7
QTL_1	LDMP	q0821	Harvest index	HI	1	32310761	34940769	Lafitte & Courtois (1999)	ISBN 970-648-052-8	1998	Los Banos, Philippines	Field	Aerobic	Upland	No stress	IR64/Azucena	indica/japonica	DH	Rice7
QTL_1	LDMP	q1732	Biomass	BIOM	1	33053493	37713775	Price et al (2002c)	10.1016/S0378-4290(02)00010-2	1998	Bangor, UK	Greenhouse	Aerobic		Water stress	Bala/Azucena	indica/japonica	RILs F6	Rice21
QTL_1	LDMP	q0580	Panicle number	PN	1	33956950	37887562	Lanceras et al (2004)	10.1104/pp.103.035527	2000	Ubon Ratchathani, Thailand	Field		Rainfed lowland	Water stress	CT9993-5-10-1-M/IR62266-42-6-2	japonica/indica	DH	Rice12
QTL_1	LDMP	q0590	Panicle number	PN	1	33956950	37887562	Lanceras et al (2004)	10.1104/pp.103.035527	2000	Ubon Ratchathani, Thailand	Field		Rainfed lowland	Water stress	CT9993-5-10-1-M/IR62266-42-6-2	japonica/indica	DH	Rice12
QTL_1	LDMP	q0595	Panicle number	PN	1	33956950	37887562	Lanceras et al (2004)	10.1104/pp.103.035527	2000	Ubon Ratchathani, Thailand	Field		Rainfed lowland	Water stress	CT9993-5-10-1-M/IR62266-42-6-2	japonica/indica	DH	Rice12
QTL_1 & QTL_2	LDMP, FW, TW	q0599	Plant height	PHGT	1	33956950	39434587	Lanceras et al (2004)	10.1104/pp.103.035527	2000	Ubon Ratchathani, Thailand	Field	Anaerobic	Rainfed lowland	No stress	CT9993-5-10-1-M/IR62266-42-6-2	japonica/indica	DH	Rice12
QTL_1 & QTL_2	LDMP, FW, TW	q0602	Plant height	PHGT	1	33956950	39434587	Lanceras et al (2004)	10.1104/pp.103.035527	2000	Ubon Ratchathani, Thailand	Field		Rainfed lowland	Water stress	CT9993-5-10-1-M/IR62266-42-6-2	japonica/indica	DH	Rice12
QTL_1	LDMP	q0604	Plant height	PHGT	1	33956950	37887562	Lanceras et al (2004)	10.1104/pp.103.035527	2000	Ubon Ratchathani, Thailand	Field		Rainfed lowland	Water stress	CT9993-5-10-1-M/IR62266-42-6-2	japonica/indica	DH	Rice12
QTL_1	LDMP	q0606	Plant height	PHGT	1	33956950	37887562	Lanceras et al (2004)	10.1104/pp.103.035527	2000	Ubon Ratchathani, Thailand	Field		Rainfed lowland	Water stress	CT9993-5-10-1-M/IR62266-42-6-2	japonica/indica	DH	Rice12
QTL_1	LDMP	q0608	Plant height	PHGT	1	33956950	37887562	Lanceras et al (2004)	10.1104/pp.103.035527	2000	Ubon Ratchathani, Thailand	Field		Rainfed lowland	Water stress	CT9993-5-10-1-M/IR62266-42-6-2	japonica/indica	DH	Rice12
QTL_1	LDMP	q0670	Biomass	BIOM	1	34471916	37713775	Xu et al (2004)	10.1007/s00122-004-1671-3	2001	Huazhong, China	Greenhouse			No stress	Zhenshan97/Minghui63	indica/indica	RILs F10	Rice28
QTL_2	FW, TW	q0001	Plant height	PHGT	1	34940404	40566030	Hemamalini et al (2000)	10.1023/A:1003854224905	1996	Bangalore, India	Field	Aerobic		No stress	IR64/Azucena	indica/japonica	DH	Rice1
QTL_2	FW, TW	q0002	Plant height	PHGT	1	34940404	40566030	Hemamalini et al (2000)	10.1023/A:1003854224905	1996	Bangalore, India	Field	Aerobic		No stress	IR64/Azucena	indica/japonica	DH	Rice1
QTL_2	FW, TW	q0003	Plant height	PHGT	1	34940404	40566030	Hemamalini et al (2000)	10.1023/A:1003854224905	1996	Bangalore, India	Field	Aerobic		Water stress	IR64/Azucena	indica/japonica	DH	Rice1
QTL_2	FW, TW	q0063	Leaf rolling score	LRS	1	34940404	40566030	Courtois et al (2000)	10.1023/A:1009652326121	1995	Los Banos, Philippines	Field	Aerobic	Upland	Water stress	IR64/Azucena	indica/japonica	DH	Rice3
QTL_2	FW, TW	q0072	Leaf rolling score	LRS	1	34940404	40566030	Courtois et al (2000)	10.1023/A:1009652326121	1995	Hazaribag, India	Field	Aerobic	Upland	Water stress	IR64/Azucena	indica/japonica	DH	Rice3
QTL_2	FW, TW	q0095	Leaf relative water content	RWC	1	34940404	40566030	Courtois et al (2000)	10.1023/A:1009652326121	1995	Los Banos, Philippines	Field	Aerobic	Upland	Water stress	IR64/Azucena	indica/japonica	DH	Rice3
QTL_2	FW, TW	q0102	Leaf relative water content	RWC	1	34940404	40566030	Courtois et al (2000)	10.1023/A:1009652326121	1996	Los Banos, Philippines	Field	Aerobic	Upland	Water stress	IR64/Azucena	indica/japonica	DH	Rice3
QTL_2	FW, TW	q0136	Plant height	PHGT	1	34940404	39433464	Courtois et al (2003)	10.1023/B:EUPH.0000004987.88718.d6	1999	Los Banos, Philippines	Greenhouse	Aerobic		No stress	IAC165/Co39	japonica/indica	RILs F7	Rice4
QTL_2	FW, TW	q0744	Plant height	PHGT	1	34940404	40566030	Lafitte & Courtois (1999)	ISBN 970-648-052-8	1995	Los Banos, Philippines	Field	Aerobic	Upland	No stress	IR64/Azucena	indica/japonica	DH	Rice7
QTL_2	FW, TW	q0748	Plant height	PHGT	1	34940404	40566030	Lafitte & Courtois (1999)	ISBN 970-648-052-8	1998	Los Banos, Philippines	Field	Aerobic	Upland	No stress	IR64/Azucena	indica/japonica	DH	Rice7
QTL_2	FW, TW	q0750	Plant height	PHGT	1	34940404	40566030	Lafitte & Courtois (1999)	ISBN 970-648-052-8	1998	Los Banos, Philippines	Field	Aerobic	Upland	Water stress	IR64/Azucena	indica/japonica	DH	Rice7
QTL_2	FW, TW	q0790	Spikelet sterility	STR	1	34940404	40566030	Lafitte & Courtois (1999)	ISBN 970-648-052-8	1995	Los Banos, Philippines	Field	Aerobic	Upland	No stress	IR64/Azucena	indica/japonica	DH	Rice7
QTL_2	FW, TW	q0796	Spikelet sterility	STR	1	34940404	40566030	Lafitte & Courtois (1999)	ISBN 970-648-052-8	1998	Los Banos, Philippines	Field	Aerobic	Upland	No stress	IR64/Azucena	indica/japonica	DH	Rice7
QTL_2	FW, TW	q0809	Grain yield	YLD	1	34940404	40566030	Lafitte & Courtois (1999)	ISBN 970-648-052-8	1995	Los Banos, Philippines	Field	Aerobic	Upland	No stress	IR64/Azucena	indica/japonica	DH	Rice7
QTL_2	FW, TW	q0814	Grain yield	YLD	1	34940404	40566030	Lafitte & Courtois (1999)	ISBN 970-648-052-8	1998	Los Banos, Philippines	Field	Aerobic	Upland	No stress	IR64/Azucena	indica/japonica	DH	Rice7
QTL_2	FW, TW	q1440	Plant height	PHGT	1	37713331	38428453	Gomez et al (2006)	10.3844/ajbbsp.2006.161.169	2003	Paramakudi, India	Field		Upland	Water stress	Bala/Azucena	indica/japonica	RILs F6	Rice40
QTL_2	FW, TW	q1459	Proportional water loss to reach a given leaf rolling score	PWLR	1	37713331	38428453	Khowaja & Price (2008)	10.1016/j.fcr.2007.12.008	2002	Aberdeen, UK	Growth chamber			No stress	Bala/Azucena	indica/japonica	RILs F6	Rice43
QTL_2	FW, TW	q1560	Plant height	PHGT	1	37713331	38428453	MacMillan et al (2006)	10.1007/s00122-006-0357-4	2001 to 2003	Aberdeen, UK	Growth chamber	Aerobic		Water stress	Bala/Azucena	indica/japonica	RILs F6	Rice41
QTL_2	FW, TW	q1568	Plant height	PHGT	1	37713331	38428453	MacMillan et al (2006)	10.1007/s00122-006-0357-4	2001 to 2003	Aberdeen, UK	Growth chamber	Aerobic		No stress	Bala/Azucena	indica/japonica	RILs F6	Rice41
QTL_2	FW, TW	q1701	Leaf rolling score	LRS	1	37713331	38428453	Price et al (2002a)	10.1023/A:1014805625790	1998	Los Banos, Philippines	Field	Aerobic	Upland	Water stress	Bala/Azucena	indica/japonica	RILs F6	Rice15
QTL_2	FW, TW	q1721	Biomass	BIOM	1	37713331	38428453	Price et al (2002c)	10.1016/S0378-4290(02)00010-2	1997	Bangor, UK	Greenhouse	Aerobic		Water stress	Bala/Azucena	indica/japonica	RILs F6	Rice21
QTL_2	FW, TW	q0551	Harvest index	HI	1	37887264	39434587	Lanceras et al (2004)	10.1104/pp.103.035527	2000	Ubon Ratchathani, Thailand	Field		Rainfed lowland	Water stress	CT9993-5-10-1-M/IR62266-42-6-2	japonica/indica	DH	Rice12
QTL_2	FW, TW	q0576	Panicle number	PN	1	37887264	38531467	Lanceras et al (2004)	10.1104/pp.103.035527	2000	Ubon Ratchathani, Thailand	Field	Anaerobic	Rainfed lowland	No stress	CT9993-5-10-1-M/IR62266-42-6-2	japonica/indica	DH	Rice12
QTL_2	FW, TW	q0585	Panicle number	PN	1	37887264	38531467	Lanceras et al (2004)	10.1104/pp.103.035527	2000	Ubon Ratchathani, Thailand	Field		Rainfed lowland	Water stress	CT9993-5-10-1-M/IR62266-42-6-2	japonica/indica	DH	Rice12
QTL_2	FW, TW	q1289	Leaf rolling score	LRS	1	37889242	40167060	Yue et al (2006)	10.1534/genetics.105.045062	2003	Huazhong, China	Field	Aerobic		Water stress	Zhenshan97/IRAT109	indica/japonica	RILs F9:10	Rice35
QTL_3	FW, TW	q1489	Biomass	BIOM	1	40076409	42413409	MacMillan et al (2006)	10.1007/s00122-006-0357-4	2001 to 2003	Aberdeen, UK	Growth chamber	Aerobic		No stress	Bala/Azucena	indica/japonica	RILs F6	Rice41
QTL_3	FW, TW	q1656	Leaf drying score	LDS	1	40076409	42413409	Price et al (2002a)	10.1023/A:1014805625790	1996	Los Banos, Philippines	Field	Aerobic	Upland	Water stress	Bala/Azucena	indica/japonica	RILs F6	Rice15
QTL_3	FW, TW	q0009	Tiller number	TN	1	40700034	41541798	Hemamalini et al (2000)	10.1007/s00122-005-0040-1	1996	Bangalore, India	Field	Aerobic		No stress	IR64/Azucena	indica/japonica	DH	Rice1
QTL_3	FW, TW	q0064	Leaf rolling score	LRS	1	40700034	41541798	Courtois et al (2000)	10.1023/A:1009652326121	1995	Los Banos, Philippines	Field	Aerobic	Upland	Water stress	IR64/Azucena	indica/japonica	DH	Rice3
QTL_3	FW, TW	q0073	Leaf rolling score	LRS	1	40700034	41541798	Courtois et al (2000)	10.1023/A:1009652326121	1995	Hazaribag, India	Field	Aerobic	Upland	Water stress	IR64/Azucena	indica/japonica	DH	Rice3
QTL_3	FW, TW	q0080	Leaf rolling score	LRS	1	40700034	41541798	Courtois et al (2000)	10.1023/A:1009652326121	1996	Los Banos, Philippines	Field	Aerobic	Upland	Water stress	IR64/Azucena	indica/japonica	DH	Rice3
QTL_3	FW, TW	q0084	Leaf drying score	LDS	1	40700034	41541798	Courtois et al (2000)	10.1023/A:1009652326121	1995	Los Banos, Philippines	Field	Aerobic	Upland	Water stress	IR64/Azucena	indica/japonica	DH	Rice3
QTL_3	FW, TW	q0096	Leaf relative water content	RWC	1	40700034	41541798	Courtois et al (2000)	10.1023/A:1009652326121	1995	Los Banos, Philippines	Field	Aerobic	Upland	Water stress	IR64/Azucena	indica/japonica	DH	Rice3
QTL_3	FW, TW	q0734	Relative growth rate	RGR	1	40700034	41541798	Courtois et al (2000)	10.1023/A:1009652326121	1995	Los Banos, Philippines	Field	Aerobic	Upland	Water stress	IR64/Azucena	indica/japonica	DH	Rice3
QTL_3	FW, TW	q0745	Plant height	PHGT	1	40700034	41541798	Lafitte & Courtois (1999)	ISBN 970-648-052-8	1995	Los Banos, Philippines	Field	Aerobic	Upland	No stress	IR64/Azucena	indica/japonica	DH	Rice7
QTL_3	FW, TW	q0751	Plant height	PHGT	1	40700034	41541798	Lafitte & Courtois (1999)	ISBN 970-648-052-8	1998	Los Banos, Philippines	Field	Aerobic	Upland	Water stress	IR64/Azucena	indica/japonica	DH	Rice7
QTL_3	FW, TW	q0780	Tiller number	TN	1	40700034	41541798	Lafitte & Courtois (1999)	ISBN 970-648-052-8	1998	Los Banos, Philippines	Field	Aerobic	Upland	No stress	IR64/Azucena	indica/japonica	DH	Rice7
QTL_3	FW, TW	q0797	Spikelet sterility	STR	1	40700034	41541798	Lafitte & Courtois (1999)	ISBN 970-648-052-8	1998	Los Banos, Philippines	Field	Aerobic	Upland	Water stress	IR64/Azucena	indica/japonica	DH	Rice7
QTL_6	FW, TW	q1399	Leaf fresh weight	LFW	2	16354218	25446496	Quarrie et al (1997)	10.1007/978-94-011-5794-0_15	1996	Norwhich, UK	Growth chamber	Aerobic		No stress	IR20/63-83	indica/japonica	F2	Rice36
QTL_7	FW, TW	q0066	Leaf rolling score	LRS	3	34625499	36396286	Courtois et al (2000)	10.1023/A:1009652326121	1995	Los Banos, Philippines	Field	Aerobic	Upland	Water stress	IR64/Azucena	indica/japonica	DH	Rice3
QTL_7	FW, TW	q0075	Leaf rolling score	LRS	3	34625499	36396286	Courtois et al (2000)	10.1023/A:1009652326121	1995	Hazaribag, India	Field	Aerobic	Upland	Water stress	IR64/Azucena	indica/japonica	DH	Rice3
QTL_7	FW, TW	q0747	Plant height	PHGT	3	32945649	34626086	Lafitte & Courtois (1999)	ISBN 970-648-052-8	1995	Los Banos, Philippines	Field	Aerobic	Upland	No stress	IR64/Azucena	indica/japonica	DH	Rice7
QTL_8	FW, TW	q1082	Stomatal resistance	STOMR	4	1146276	17696172	Teng et al (2004)	10.1023/B:EUPH.0000009487.89270.e9	2000	Hangzhou, China	Field	Anaerobic	Irrigated	No stress	ZYQ18/JX17	indica/japonica	DH	Rice29
QTL_8	FW, TW	q1083	Transpiration rate	TRANSP	4	1146276	25179167	Teng et al (2004)	10.1023/B:EUPH.0000009487.89270.e9	2000	Hangzhou, China	Field	Anaerobic	Irrigated	No stress	ZYQ18/JX17	indica/japonica	DH	Rice29
QTL_8	FW, TW	q0180	Osmotic adjustment	OA	4	7926084	24690798	Robin et al (2003)	10.1007/s00122-003-1360-7	1999	Los Banos, Philippines	Greenhouse	Aerobic		Water stress	IR62266-42-6-2/IR60080-46A	indica/japonica	BC3F3	Rice6
QTL_8	FW, TW	q0596	Panicle number	PN	4	8610617	17696172	Lanceras et al (2004)	10.1104/pp.103.035527	2000	Ubon Ratchathani, Thailand	Field		Rainfed lowland	Water stress	CT9993-5-10-1-M/IR62266-42-6-2	japonica/indica	DH	Rice12
QTL_8	FW, TW	q0536	Grain yield	YLD	4	11234426	21453222	Lanceras et al (2004)	10.1104/pp.103.035527	2000	Ubon Ratchathani, Thailand	Field		Rainfed lowland	Water stress	CT9993-5-10-1-M/IR62266-42-6-2	japonica/indica	DH	Rice12
QTL_8	FW, TW	q0048	Leaf drying score	LDS	4	13634884	17696172	Hemamalini et al (2000)	10.1007/s00122-005-0040-1	1996	Bangalore, India	Field	Aerobic		Water stress	IR64/Azucena	indica/japonica	DH	Rice1
QTL_8	FW, TW	q0089	Leaf drying score	LDS	4	13634884	17696172	Courtois et al (2000)	10.1023/A:1009652326121	1996	Los Banos, Philippines	Field	Aerobic	Upland	Water stress	IR64/Azucena	indica/japonica	DH	Rice3
QTL_8	FW, TW	q0577	Panicle number	PN	4	13634884	21453222	Lanceras et al (2004)	10.1104/pp.103.035527	2000	Ubon Ratchathani, Thailand	Field	Anaerobic	Rainfed lowland	No stress	CT9993-5-10-1-M/IR62266-42-6-2	japonica/indica	DH	Rice12
QTL_8	FW, TW	q0582	Panicle number	PN	4	13634884	21453222	Lanceras et al (2004)	10.1104/pp.103.035527	2000	Ubon Ratchathani, Thailand	Field		Rainfed lowland	Water stress	CT9993-5-10-1-M/IR62266-42-6-2	japonica/indica	DH	Rice12
QTL_8	FW, TW	q0587	Panicle number	PN	4	13634884	17696172	Lanceras et al (2004)	10.1104/pp.103.035527	2000	Ubon Ratchathani, Thailand	Field		Rainfed lowland	Water stress	CT9993-5-10-1-M/IR62266-42-6-2	japonica/indica	DH	Rice12
QTL_8	FW, TW	q0591	Panicle number	PN	4	13634884	21453222	Lanceras et al (2004)	10.1104/pp.103.035527	2000	Ubon Ratchathani, Thailand	Field		Rainfed lowland	Water stress	CT9993-5-10-1-M/IR62266-42-6-2	japonica/indica	DH	Rice12
QTL_8	FW, TW	q1511	Biomass	BIOM	4	16678099	17696172	MacMillan et al (2006)	10.1007/s00122-006-0357-4	2001 to 2003	Aberdeen, UK	Growth chamber	Aerobic		No stress	Bala/Azucena	indica/japonica	RILs F6	Rice41
QTL_8	FW, TW	q1678	Leaf relative water content	RWC	4	16678099	17696172	Price et al (2002a)	10.1023/A:1014805625790	1998	Bouaké, Côte d'Ivoire	Field	Aerobic	Upland	Water stress	Bala/Azucena	indica/japonica	RILs F6	Rice15
QTL_9	FW, TW	q1555	Plant height	PHGT	6	2560741	4089249	MacMillan et al (2006)	10.1007/s00122-006-0357-4	2001 to 2003	Aberdeen, UK	Growth chamber	Aerobic		No stress	Bala/Azucena	indica/japonica	RILs F6	Rice41
QTL_9	FW, TW	q1681	Leaf relative water content	RWC	6	2560741	4089249	Price et al (2002a)	10.1023/A:1014805625790	1998	Bouaké, Côte d'Ivoire	Field	Aerobic	Upland	Water stress	Bala/Azucena	indica/japonica	RILs F6	Rice15
QTL_9	FW, TW	q0636	Relative retention of leaf greenness	RRLG	6	2831443	4844376	Jiang et al (2004)	10.1007/s00122-003-1465-z	2001&2002 (combined)	Huazhong, China	Field	Anaerobic	Irrigated	No stress	Zhenshan97/Wuyujing2	indica/japonica	DH	Rice13
QTL_9	FW, TW	q0754	Days to flowering	DTF	6	3459492	6283916	Lafitte & Courtois (1999)	ISBN 970-648-052-8	1995	Los Banos, Philippines	Field	Aerobic	Upland	No stress	IR64/Azucena	indica/japonica	DH	Rice7
QTL_10	FW, TW	q0644	Retention of green leaf area	RGLA	6	7592048	27252383	Jiang et al (2004)	10.1007/s00122-003-1465-z	2001&2002 (combined)	Huazhong, China	Field	Anaerobic	Irrigated	No stress	Zhenshan97/Wuyujing2	indica/japonica	DH	Rice13
QTL_10	FW, TW	q0650	Retention of green leaf area	RGLA	6	7592048	27252383	Jiang et al (2004)	10.1007/s00122-003-1465-z	2001&2002 (combined)	Huazhong, China	Field	Anaerobic	Irrigated	No stress	Zhenshan97/Wuyujing2	indica/japonica	DH	Rice13
QTL_10	FW, TW	q1076	Number late discoloring leaves per plant	NLDL	6	8751256	27252383	Abdelkhalik et al (2005)	10.1007/s00122-005-1955-2	2003	Nihon, Japan	Growth chamber	Aerobic		No stress	IR36/Nekken2//Nekken2	indica/japonica	BC1F1	Rice18
QTL_10	FW, TW	q0104	Leaf relative water content	RWC	6	12333722	19338094	Courtois et al (2000)	10.1023/A:1009652326121	1996	Los Banos, Philippines	Field	Aerobic	Upland	Water stress	IR64/Azucena	indica/japonica	DH	Rice3
QTL_11	FW, TW, DW	q0538	Grain yield	YLD	10	12684265	21777338	Lanceras et al (2004)	10.1104/pp.103.035527	2000	Ubon Ratchathani, Thailand	Field		Rainfed lowland	Water stress	CT9993-5-10-1-M/IR62266-42-6-2	japonica/indica	DH	Rice12
QTL_11	FW, TW, DW	q0144	Tiller number	TN	10	15844400	18014633	Courtois et al (2003)	10.1023/B:EUPH.0000004987.88718.d6	1999	Los Banos, Philippines	Greenhouse	Aerobic		No stress	IAC165/Co39	japonica/indica	RILs F7	Rice4
QTL_11	FW, TW, DW	q0759	Days to flowering	DTF	10	16619676	17845342	Lafitte & Courtois (1999)	ISBN 970-648-052-8	1998	Los Banos, Philippines	Field	Aerobic	Upland	No stress	IR64/Azucena	indica/japonica	DH	Rice7
QTL_11	FW, TW, DW	q0762	Days to flowering	DTF	10	16619676	17845342	Lafitte & Courtois (1999)	ISBN 970-648-052-8	1998	Los Banos, Philippines	Field	Aerobic	Upland	Water stress	IR64/Azucena	indica/japonica	DH	Rice7
QTL_11	FW, TW, DW	q0765	Delay in flowering time	DFT	10	16619676	17845342	Lafitte & Courtois (1999)	ISBN 970-648-052-8	1998	Los Banos, Philippines	Field	Aerobic	Upland	Water stress	IR64/Azucena	indica/japonica	DH	Rice7
QTL_11	FW, TW, DW	q0654	Retention of green leaf area	RGLA	10	16637070	18014633	Jiang et al (2004)	10.1007/s00122-003-1465-z	2001&2002 (combined)	Huazhong, China	Field	Anaerobic	Irrigated	No stress	Zhenshan97/Wuyujing2	indica/japonica	DH	Rice13
QTL_11	FW, TW, DW	q0620	Retention degree of leaf greenness	RDLG	10	18014265	18655769	Jiang et al (2004)	10.1007/s00122-003-1465-z	2001&2002 (combined)	Huazhong, China	Field	Anaerobic	Irrigated	No stress	Zhenshan97/Wuyujing2	indica/japonica	DH	Rice13
QTL_11	FW, TW, DW	q0648	Retention of green leaf area	RGLA	10	18014265	18655769	Jiang et al (2004)	10.1007/s00122-003-1465-z	2001&2002 (combined)	Huazhong, China	Field	Anaerobic	Irrigated	No stress	Zhenshan97/Wuyujing2	indica/japonica	DH	Rice13
QTL_12	FW, TW	q1409	Canopy temperature	CT	12	4103124	7477673	Gomez et al (2006)	10.3844/ajbbsp.2006.161.169	2003	Paramakudi, India	Field		Upland	Water stress	Bala/Azucena	indica/japonica	RILs F6	Rice40
QTL_13	FW, TW	q1713	Carbon isotope discrimination	CID	12	23774861	27404906	Price et al (2002b)	10.1093/jexbot/53.371.989	1997	Bouaké, Côte d'Ivoire	Field	Aerobic	Upland	No stress	Bala/Azucena	indica/japonica	RILs F6	Rice37
QTL_13	FW, TW	q0049	Leaf drying score	LDS	12	26017330	27488769	Hemamalini et al (2000)	10.1007/s00122-005-0040-1	1996	Bangalore, India	Field	Aerobic		Water stress	IR64/Azucena	indica/japonica	DH	Rice1
QTL_13	FW, TW	q0730	Leaf rolling score	LRS	12	26107904	27404906	Yue et al (2005)	10.1007/s00122-005-0040-1	2005	Huazhong, China	Field	Anaerobic	Irrigated	Water stress	Zhenshan97/IRAT109	indica/japonica	RILs F8:10	Rice27
QTL_13	FW, TW	q1322	Relative rate of fertile panicle	RFP	12	26107904	27404906	Yue et al (2006)	10.1534/genetics.105.045062	2003	Huazhong, China	Field			Water stress	Zhenshan97/IRAT109	indica/japonica	RILs F9:10	Rice35
QTL_13	FW, TW	q1323	Relative rate of fertile panicle	RFP	12	26107904	27404906	Yue et al (2006)	10.1534/genetics.105.045062	2004	Huazhong, China	Field			Water stress	Zhenshan97/IRAT109	indica/japonica	RILs F9:10	Rice35
References:
Rice1	Hemamalini GS, Shashidhar HE, Hittalmani S (2000) Molecular marker assisted tagging of morphological and physiological traits under two contrasting moisture regimes at peak vegetative stage in rice. Euphytica 112:69-78.
Rice3	Courtois B, McLaren G, Sinha PK, Prasad K, Yadav R, Shen L (2000) Mapping QTLs associated with drought avoidance in upland rice. Molecular Breeding 6:55-66.
Rice4	Courtois B, Shen L, Petalcorin W, Carandang S, Mauleon R, Li Zm(2003). Locating QTLs controlling constitutive root traits in the rice population IAC 165x Co39. Euphytica 134:335-345.
Rice6	Robin S, Pathan MS, Courtois B, Lafitte R, Carandang S, Lanceras S, Amante M, Nguyen HT, Li, Z (2003) Mapping osmotic adjustment in an advanced back-cross inbred population of rice. Theor Appl Genet 107(7):1288-1296.
Rice7	Lafitte R, Courtois B (1999) Genetic variation in performance under reproductive-stage water deficit in a doubled haploid rice population in upland fields. In: Molecular approaches for the genetic improvement of cereals for stable production in water-limited environment. Mexico:CIMMYT, pp 97-102.
Rice9	Tripathy JN, Zhang J, Robin S, Nguyen TT, Nguyen HT (2000) QTLs for cell-membrane stability mapped in rice under drought stress. Theor Appl Genet 100: 1197-1202.
Rice12	Lanceras JC, Pantuwan G, Jongdee B, Toojinda T (2004) Quantitative trait loci associated with drought tolerance at reproductive stage in rice. Plant Physiology 135:384-399.
Rice13	Jiang GH, He YQ, Xu CG, Li XH, Zhang Q (2004) The genetic basis of stay-green in rice analyzed in a population of doubled haploid lines derived from an indica by japonica cross. Theor Appl Genet 108: 688-698.
Rice15	Price AH, Townend J, Jones MP, Audebert A, Courtois B (2002a) Mapping QTLs associated with drought avoidance in upland rice grown in the Philippines and West Africa. Plant Molecular Biology 48:683-695.
Rice18	Abdelkhalik AF, Shishido R, Nomura K, & Ikehashi H (2005) QTL-based analysis of leaf senescence in an indica/japonica hybrid in rice (Oryza sativa L.). Theoretical and Applied Genetics 110(7):1226-1235. doi:10.1007/s00122-005-1955-2.
Rice21	Price AH, Steele KA, Moore BJ, Jones RGW (2002c) Upland rice grown in soil filled chambers and exposed to contrasting water-deficit regimes. II. Mapping QTLs for root morphology and distribution. Field Crop Research 76:25-43.
Rice27	Yue B, Xiong L, Xue W, Xing Y, Luo L, Xu C (2005) Genetic analysis for drought resistance of rice at reproductive stage in field with different types of soil. Theor Appl Genet 111:1127-1136.
Rice28	Xu CG, Li XQ, Xue Y, Huang YW, Gao J, Xing YZ (2004) Comparison of quantitative trait loci controlling seedling characteristics at two seedling stages using rice recombinant inbred lines. Theor Appl Genet 109: 640-647.
Rice29	Teng, S., Qian, Q., Zeng, D., Kunihiro, Y., Fujimoto, K., Huang, D., & Zhu, L. (2004). QTL analysis of leaf photosynthetic rate and related physiological traits in rice (Oryza sativa L.). Euphytica, 135(1), 1–7. doi:10.1023/b:euph.0000009487.89270.
Rice35	Yue B, Xue W, Xiong L, Yu X, Luo L, Cui K, Jin D, Xing Y, Zhang Q (2006) Genetic basis of drought resistance at reproductive stage in rice: separation of drought tolerance from drought avoidance. Genetics 172: 1213-1228.
Rice36	Quarrie SA, Laurie DA, Zhu J, Lebreton C, Semikhodskii A, Steed A, Witsenboer H, Calestani C (1997) QTL analysis to study the association between leaf size and abscisic acid accumulation in droughted rice leaves and comparison across cereals. Plant Mol biol 35: 155-165.
Rice37	Price AH, Cairns JE, Horton P, Jones HG, Griffiths H (2002b) Linking drought-resistance mechanisms to drought avoidance in upland rice using a QTL approach: progress and new opportunities to integrate stomatal and mesophyll response. J of Exp Bot 53: 989-1004.
Rice40	Gomez MS, Kumar SS, Jeyaprakash P, Suresh R, Biji KR, Boopathi NM, Price AH, Babu RC (2006) Mapping QTLs linked to physio-morphological and plant production traits under drought stress in rice in the target environment. Am J Bioch & Biotech 2(4):161-169.
Rice41	MacMillan K, Emrich K, Piepho H-P, Mullins CE, Price AH (2006) Assessing the importance of genotype x environmental interaction for root traits in rice using a mapping population II: conventional QTL analysis . Theor Appl Genet 113: 953-964.
Rice43	Khowaja F, Price A (2008) QTL mapping rolling, stomatal conductance and dimension traits of excised leaves in the Bala x Azucena recombinant inbred population of rice. Field Crops Research 106:248–257.

## Sheet: Table D
Table D. Co-locations of the GWAS associations identified in current and previous studies using the same rice panel and genotypic data
ID	QTL ID in paper	Trait	Chromosome	Site	Left (-50kb)	Right (+50 kb)	DOI	Reference
1	QTL_5	Leaf fresh weight	2	6162441	6112441	6212441		This study
2	QTL_5	Leaf turgid weight	2	6162441	6112441	6212441		This study
3	QTL_5	Leaf fresh weight	2	6196654	6146654	6246654		This study
4	QTL_5	Leaf turgid weight	2	6196654	6146654	6246654		This study
5	q20	Root depth	2	6217128	6167128	6267128	10.1186/s12870-016-0747-y	Phung et al. (2016)
6	QTL_5	Leaf fresh weight	2	6219733	6169733	6269733		This study
7	QTL_5	Leaf turgid weight	2	6219733	6169733	6269733		This study
8	QTL_6	Leaf fresh weight	2	24125340	24075340	24175340		This study
9	QTL_6	Leaf turgid weight	2	24125340	24075340	24175340		This study
10	QTL_10	Primary branch number	2	24125340	24075340	24175340	10.1186/s12870-018-1504-47	Ta et al. (2018)
11	QTL_6	Leaf fresh weight	2	24125366	24075366	24175366		This study
12	QTL_6	Leaf turgid weight	2	24125366	24075366	24175366		This study
13	QTL_10	Primary branch number	2	24125366	24075366	24175366	10.1186/s12870-018-1504-48	Ta et al. (2018)
14	QTL_6	Leaf fresh weight	2	24128723	24078723	24178723		This study
15	QTL_6	Leaf turgid weight	2	24128723	24078723	24178723		This study
16	QTL_10	Primary branch number	2	24128723	24078723	24178723	10.1186/s12870-018-1504-49	Ta et al. (2018)
17	QTL_11	Leaf fresh weight	6	17773531	17723531	17823531		This study
18	QTL_11	Leaf turgid weight	6	17773531	17723531	17823531		This study
19	QTL_11	Leaf fresh weight	6	17792351	17742351	17842351		This study
20	QTL_11	Leaf turgid weight	6	17792351	17742351	17842351		This study
21	QTL_11	Leaf turgid weight	6	17792359	17742359	17842359		This study
22	q5	Relative crop growth rate	6	17849604	17799604	17899604	10.1186/s12284-018-0258-6	Hoang et al. (2019)
23	QTL_12	Leaf fresh weight	10	17948827	17898827	17998827		This study
24	QTL_12	Leaf turgid weight	10	17948827	17898827	17998827		This study
25	QTL_12	Leaf fresh weight	10	18043480	17993480	18093480		This study
26	QTL_12	Leaf turgid weight	10	18043480	17993480	18093480		This study
27	QTL_12	Leaf dry weight	10	18043480	17993480	18093480		This study
28	QTL_24	Primary branch number	10	18043480	17993480	18093480	10.1186/s12870-018-1504-144	Ta et al. (2018)
29	QTL_12	Leaf fresh weight	10	18044898	17994898	18094898		This study
30	QTL_12	Leaf turgid weight	10	18044898	17994898	18094898		This study
31	QTL_12	Leaf dry weight	10	18044898	17994898	18094898		This study
32	QTL_12	Leaf fresh weight	10	18059128	18009128	18109128		This study
33	QTL_12	Leaf turgid weight	10	18059128	18009128	18109128		This study
34	QTL_12	Leaf dry weight	10	18059128	18009128	18109128		This study
35	QTL_12	Leaf fresh weight	10	18059798	18009798	18109798		This study
36	QTL_12	Leaf turgid weight	10	18059798	18009798	18109798		This study
37	QTL_12	Leaf dry weight	10	18059798	18009798	18109798		This study
Associations co-localized in the other papers are highlighted in bold
Similar associations detected in the present study and the others are highlighted in red
